# Supplementary material for: A Customized Intervention Program Aiming to Improve Healthy Eating and Physical Activity Among Preschool Children: Protocol for a Randomized Controlled Trial (Iran Healthy Start Study)
Source: PubMed Central journal article supplement (PMC6324517; doi:10.2196/11329), 2018-12-21
Supplement: resprot_v7i11e11329_app2.pdf [file resprot_v7i11e11329_app2.pdf]

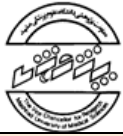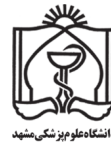

|                                                                                                                                            |                             |
|--------------------------------------------------------------------------------------------------------------------------------------------|-----------------------------|
| <b>عنوان پروژه: « اجرا و سنجش پایلوت مداخله بومی سازی شده با هدف افزایش فعالیت فیزیکی و تغذیه سالم در میان کودکان پیش دبستانی در ایران</b> |                             |
| شماره: 941586                                                                                                                              | مجربان طرح: دکتر محسن نعمتی |
| مدت زمان اجرای طرح (ماه): 26 ماه                                                                                                           | جمع هزینه طرح: 304.300.000  |
| مقطع (اگر طرح پیشنهادی پایان نامه است): (.....)                                                                                            |                             |
| اسناد و ضمایم همراه طرح                                                                                                                    |                             |
| -                                                                                                                                          |                             |
| -                                                                                                                                          |                             |
| -                                                                                                                                          |                             |

- ✚ در صورتی داوری این طرح را بپذیرید که در حوزه این پژوهش تخصص کافی را داشته و اشتراک یا تضاد منافی با پژوهشگران این طرح نداشته باشید.
- ✚ لطفاً با استقلال کامل، شفافیت (transparency)، اخلاق و رفتار جوانمردانه (fairness) طرح را داوری نمایید.
- ✚ داوری شما مبنا اصلی تصمیم گیری نهایی برای پذیرش و رد این پژوهش است لذا با دقت فراوان و توجه به نقاط قوت و ضعف، داوری خود را انجام داده و هر نکته ای که به بهبود پژوهش کمک می کند را ذکر نمایید.
- ✚ توصیه های خود را به شکلی بنویسید که برای طراحان مفهوم، مفید، اختصاصی و حاوی اطلاعات کافی برای اصلاح پژوهش باشد. از ذکر جملات کلی نظیر "نامناسب است" اجتناب نمایید.
- ✚ در داوری خود فقط و فقط مسائل علمی را لحاظ نموده و در هر بخش حتماً نکات مثبت و منفی را ذکر نمایید.
- ✚ نظر کلی خود در مورد هر بخش را بطور مستقل از بخش های دیگر منظور نمایید و اشکال یک بخش نباید در ارزیابی شما در بخش های دیگر مجدداً لحاظ شود.

| <b>هدف و ضرورت انجام کار</b>                                                                         |     |      |       |        |  |
|------------------------------------------------------------------------------------------------------|-----|------|-------|--------|--|
| در نگارش نکات مثبت و منفی موارد زیر را در نظر بگیرید.                                                |     |      |       |        |  |
| ✓ هدف چقدر دقیق و شفاف بیان شده است.                                                                 |     |      |       |        |  |
| ✓ مشکل و ضرورت انجام پژوهش چقدر شفاف و قابل راستی آزمایی است و آیا در راستای هدف است.                |     |      |       |        |  |
| ✓ تئوری و شواهد ذکر شده برای حمایت از ضرورت انجام کار و مشکل مطرح شده کافی است.                      |     |      |       |        |  |
| ✓ هدف و یافته های احتمالی این پژوهش چقدر برای شما جالب است.                                          |     |      |       |        |  |
| ✓ در صورت وجود مداخله مزایا و معایب آن در مقایسه با روش معمول ذکر شده است.                           |     |      |       |        |  |
| نکات مثبت: همه نکات فوق رعایت شده است.                                                               |     |      |       |        |  |
| تعیین مزایا و معایب مداخله از اهداف این تحقیق است و روش معمولی برای مقایسه وجود ندارد.               |     |      |       |        |  |
| نکات منفی: -                                                                                         |     |      |       |        |  |
| به لحاظ هدف و ضرورت طرح:                                                                             |     |      |       |        |  |
| خیلی خوب                                                                                             | خوب | کافی | متوسط | ناکافی |  |
| <b>استراتژی و روش اجرا و قابل اجرا بودن در شرایط کشور</b>                                            |     |      |       |        |  |
| در نگارش نکات مثبت و منفی موارد زیر را در نظر بگیرید.                                                |     |      |       |        |  |
| ✓ شفافیت                                                                                             |     |      |       |        |  |
| ✓ طراحی، روش اجرا و روش آنالیز به اندازه کافی تشریح شده است و براساس آن می توان مطالعه را تکرار کرد. |     |      |       |        |  |

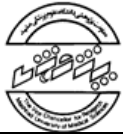

|                                                                                                                                        |
|----------------------------------------------------------------------------------------------------------------------------------------|
| ✓ چشم انداز رسیدن به اهداف با استفاده از روش اجرا پیشنهادی                                                                             |
| ✓ واقع گرایانه بودن حجم نمونه و امکانات در اختیار                                                                                      |
| ✓ واقع گرایانه بودن توانایی‌ها، موانع و محدودیت‌های بالقوه ذکر شده                                                                     |
| نکات مثبت: شفاف سازی خود بخشی از این طرح پژوهشی است که بصورت سنجش روایی و پایایی ابزارهای استفاده شده کانادایی در مشهد ارائه خواهد شد. |

نکات منفی: در مورد **random allocation** و **blindness** که نقاط قوت مطالعات مداخله ای است هیچ طراحی خاصی انجام نشده است. نمونه گیری تصادفی برای این طرح امکانپذیر است اما در نظر گرفته نشده است.

|                       |          |     |      |       |               |
|-----------------------|----------|-----|------|-------|---------------|
| به لحاظ روش اجرا طرح: | خیلی خوب | خوب | کافی | متوسط | <b>ناکافی</b> |
|-----------------------|----------|-----|------|-------|---------------|

**پژوهشگران**

|                                                       |
|-------------------------------------------------------|
| در نگارش نکات مثبت و منفی موارد زیر را در نظر بگیرید. |
| ✓ تخصص مناسب و چندوجهی بودن تیم پژوهشی                |
| ✓ سوابق و کارهای پژوهشی گذشته                         |
| ✓ توان این تیم در به پایان رساندن موفق این پژوهش      |
| ✓ نیاز به متدولوژیست                                  |

نکات مثبت: به جز نکات زیر، سایر موارد به خوبی رعایت شده است.

نکات منفی: حضور متدولوژیست بسیار مفید خواهد بود و از بروز خطاهای احتمالی پیشگیری خواهد کرد. تخصصهای تکراری در میان پژوهشگران وجود دارد.

|                  |          |            |      |       |        |
|------------------|----------|------------|------|-------|--------|
| ترکیب تیم پژوهشی | خیلی خوب | <b>خوب</b> | کافی | متوسط | ناکافی |
|------------------|----------|------------|------|-------|--------|

**ارزیابی نوآوری، ارتباط با نیاز و اولویت جامعه و نحوه و زمان لازم برای بکارگیری دستاورد پژوهش در کشور**

|                                                                                                                                                                                                                                                       |
|-------------------------------------------------------------------------------------------------------------------------------------------------------------------------------------------------------------------------------------------------------|
| در نگارش نکات مثبت و منفی موارد زیر را در نظر بگیرید.                                                                                                                                                                                                 |
| ✓ این پژوهش چیزی را به دانسته‌های ما اضافه می‌کند.                                                                                                                                                                                                    |
| ✓ شکاف مهمی را در دانش پر یا در حوزه ای است که اختلاف نظر و نتایج متناقض وجود دارد.                                                                                                                                                                   |
| ✓ این پژوهش محصولی جدید شامل دارو، وسیله، روش درمانی/جراحی، دستورالعمل یا ... تولید می‌کند.                                                                                                                                                           |
| ✓ تکرار پژوهش‌های قبلی یا در حال اجرا که شما مطلع هستید اما از روشی بهتر، دستگاهی دقیقتر برای اندازه گیری، حجم نمونه بالاتر برخوردار است یا انجام آن در جمعیت مورد نظر پژوهشگر (مثلا جمعیت ایرانی) لازم یا انتظار هست در این جمعیت نتایج متفاوت باشد. |
| ✓ این پژوهش براساس نیاز و مشکل جامعه است.                                                                                                                                                                                                             |
| ✓ نفع پژوهش برای بیمار یا سلامت جامعه در کوتاه مدت و بلندمدت (کیفیت خدمات بهداشتی-درمانی، هزینه اثربخشی، کاهش افراد بیمار که کار یا مدرسه را ترک می‌کنند و ...) لحاظ شده است.                                                                         |
| ✓ امکان بکارگیری وسیع نتایج این پژوهش وجود دارد                                                                                                                                                                                                       |
| ✓ روش بکارگیری وسیع نتایج توضیح داده شده و قابل قبول است.                                                                                                                                                                                             |

نکات مثبت:  
 این پژوهش می‌تواند به تولید دستورالعمل ختم شود. براساس نیاز و مشکل جامعه است. نفع پژوهش برای بیمار یا سلامت جامعه در کوتاه مدت و بلندمدت است. امکان بکارگیری وسیع نتایج این پژوهش وجود دارد.

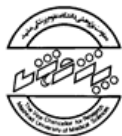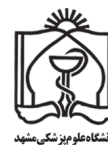

نکات منفی: -

|        |       |      |     |          |                                               |
|--------|-------|------|-----|----------|-----------------------------------------------|
| ناکافی | متوسط | کافی | خوب | خیلی خوب | نوآوری، ارتباط طرح با نیاز و اولویت جامعه ... |
|--------|-------|------|-----|----------|-----------------------------------------------|

**بودجه**

|                                                                                                                                                                                                                                                          |  |           |  |              |  |
|----------------------------------------------------------------------------------------------------------------------------------------------------------------------------------------------------------------------------------------------------------|--|-----------|--|--------------|--|
| <p>✓ هزینه مواد و وسایل و هزینه پرسنلی</p> <p>✓ هزینه اثربخشی: بالانس بین توان، هزینه و منابعی که باید صرف شود و مزایا و نتایج احتمالی چگونه است.</p> <p>نکات اصلاحی: بهتر است توسط کارشناسان پژوهشی که در حوزه هزینه ها آگاهی کافی دارند انجام شود.</p> |  |           |  |              |  |
| در مجموع بودجه درخواستی:                                                                                                                                                                                                                                 |  | خیلی زیاد |  | واقع گرایانه |  |
|                                                                                                                                                                                                                                                          |  | خیلی کم   |  |              |  |

**اخلاق**

|                                                                                                                                                                                                                                                                                                                                                                                                                                                                                                                                                                                                                                                                                                                                                                                                                                                                                                                                                                                                                                                                                                                                                                                                                                                                                                                                                                                                                                                                                                                                                                                                                                                                                                                                                                                                                                                                                                                                                                                                                                                                                                                                                                                                                                                                                                                                                                                                                                                                                                                                                                                                                                                |  |  |  |  |  |
|------------------------------------------------------------------------------------------------------------------------------------------------------------------------------------------------------------------------------------------------------------------------------------------------------------------------------------------------------------------------------------------------------------------------------------------------------------------------------------------------------------------------------------------------------------------------------------------------------------------------------------------------------------------------------------------------------------------------------------------------------------------------------------------------------------------------------------------------------------------------------------------------------------------------------------------------------------------------------------------------------------------------------------------------------------------------------------------------------------------------------------------------------------------------------------------------------------------------------------------------------------------------------------------------------------------------------------------------------------------------------------------------------------------------------------------------------------------------------------------------------------------------------------------------------------------------------------------------------------------------------------------------------------------------------------------------------------------------------------------------------------------------------------------------------------------------------------------------------------------------------------------------------------------------------------------------------------------------------------------------------------------------------------------------------------------------------------------------------------------------------------------------------------------------------------------------------------------------------------------------------------------------------------------------------------------------------------------------------------------------------------------------------------------------------------------------------------------------------------------------------------------------------------------------------------------------------------------------------------------------------------------------|--|--|--|--|--|
| <p>در نگارش نکات اصلاحی و ارزیابی خود موارد زیر را در نظر بگیرید.</p> <p>✓ با مطالعه دقیق چک لیست اخلاق (مطالعات انسانی و حیوانی) و در صورت وجود مداخله مزایا و معایب احتمالی آن را برای آزمودنی لحاظ نمایید.</p> <p>✓ فرم رضایتنامه آگاهانه (در صورت نیاز) باید به زبان آزمودنی نوشته شود و اطلاعات کافی برای گرفتن تصمیم آگاهانه در آن وجود داشته باشد.</p> <p>✓ هدف اصلی هر پژوهش باید ارتقای سلامت انسانها توأم با رعایت کرامت و حقوق ایشان باشد.</p> <p>✓ در پژوهش بر آزمودنی انسانی، سلامت و ایمنی آزمودنیها در طول و بعد از اجرای پژوهش، بر تمامی مصالح دیگر اولویت دارد.</p> <p>✓ پژوهش بر انسان فقط در صورتی توجیه پذیر است که منافع بالقوهی آن برای هر فرد آزمودنی بیش تر از خطرهای آن باشد.</p> <p>✓ مواردی از قبیل سرعت، سهولت کار، راحتی پژوهشگر، هزینهی پایین تر و/ یا صرفاً عملی بودن آن به هیچ وجه نباید موجب قرار دادن آزمودنی در معرض خطر یا زیان افزوده یا تحمیل هر گونه محدودیت اختیار اضافی به وی شود.</p> <p>✓ در کارآزمایی های بالینی دوسوکور که آزمودنی از ماهیت دارویی یا مداخله ای که برای وی تجویز شده بی اطلاع است، پژوهشگر باید تدابیر لازم جهت کمک رسانی به آزمودنی در صورت لزوم و در شرایط اضطراری را تدارک ببیند.</p> <p>✓ در پژوهش های پزشکی که ممکن است به محیط زیست آسیب برسانند، باید احتیاطهای لازم در جهت حفظ و نگهداری و عدم آسیب رسانی به محیط زیست انجام گیرد.</p> <p>✓ در پژوهش هایی که از مواد بدنی (شامل بافتها و مایعات بدن انسان) یا داده هایی استفاده می شود که هویت صاحبان آنها معلوم یا قابل کشف و ردیابی است، باید برای جمع آوری، تحلیل، ذخیره سازی و /یا استفاده ی مجدد از آنها رضایت آگاهانه گرفته شود.</p> <p>✓ در مواردی که آگاه کردن آزمودنی درباره ی جنبه های از پژوهش باعث کاهش اعتبار پژوهش می شود، ضرورت اطلاع رسانی ناکامل از طرف پژوهشگر باید توسط کمیته ی اخلاق تأیید شود. بعد از رفع عامل این محدودیت، باید اطلاع رسانی کامل به آزمودنی انجام گیرد.</p> <p>✓ برخی از افراد یا گروه هایی از مردم، نظیر ناتوانان ذهنی، کودکان، جنین و نوزاد، بیماران اورژانسی، یا زندانیان، سرباز که ممکن است به عنوان آزمودنی در پژوهش شرکت کنند، نمی توانند برای دادن رضایت، آگاهی یا آزادی لازم را داشته باشند. این افراد یا گروه ها آسیب پذیر دانسته می شوند و باید مورد حفاظت ویژه قرار گیرند.</p> <p>✓ پژوهشگر مسؤول رعایت اصل رازداری و حفظ اسرار آزمودنیها و اتخاذ تدابیر مناسب برای جلوگیری از انتشار آن است. هم چنین، پژوهشگر موظف است که از رعایت حریم خصوصی آزمودنیها در طول پژوهش اطمینان حاصل کند. هرگونه انتشار داده ها یا اطلاعات به دست آمده از بیماران باید بر اساس رضایت آگاهانه انجام گیرد.</p> <p>✓ روش پژوهش نباید با ارزش های اجتماعی، فرهنگی و دینی جامعه در تناقض باشد.</p> <p>✓ مطالعات حیوانی باید با رعایت کامل اصول اخلاقی کار با حیوانات آزمایشگاهی انجام شوند.</p> |  |  |  |  |  |
|------------------------------------------------------------------------------------------------------------------------------------------------------------------------------------------------------------------------------------------------------------------------------------------------------------------------------------------------------------------------------------------------------------------------------------------------------------------------------------------------------------------------------------------------------------------------------------------------------------------------------------------------------------------------------------------------------------------------------------------------------------------------------------------------------------------------------------------------------------------------------------------------------------------------------------------------------------------------------------------------------------------------------------------------------------------------------------------------------------------------------------------------------------------------------------------------------------------------------------------------------------------------------------------------------------------------------------------------------------------------------------------------------------------------------------------------------------------------------------------------------------------------------------------------------------------------------------------------------------------------------------------------------------------------------------------------------------------------------------------------------------------------------------------------------------------------------------------------------------------------------------------------------------------------------------------------------------------------------------------------------------------------------------------------------------------------------------------------------------------------------------------------------------------------------------------------------------------------------------------------------------------------------------------------------------------------------------------------------------------------------------------------------------------------------------------------------------------------------------------------------------------------------------------------------------------------------------------------------------------------------------------------|--|--|--|--|--|

نکات اصلاحی: -

|                  |               |                     |               |                  |
|------------------|---------------|---------------------|---------------|------------------|
| غیر قابل اخلاقی: | غیر قابل اجرا | با دقت و نظارت زیاد | <b>اخلاقی</b> | غیر قابل ارزیابی |
|------------------|---------------|---------------------|---------------|------------------|

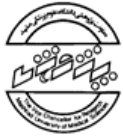

دانشگاه علوم پزشکی مشهد  
معاونت پژوهش و فناوری  
**فرم ارزیابی طرحهای پژوهشی**

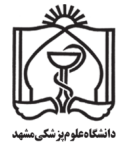

نام و نام خانوادگی داور: داور دوم  
امضا
