# Supplementary material for: A Customized Intervention Program Aiming to Improve Healthy Eating and Physical Activity Among Preschool Children: Protocol for a Randomized Controlled Trial (Iran Healthy Start Study)
Source: PubMed Central journal article supplement (PMC6324517; doi:10.2196/11329), 2018-12-21
Supplement: resprot_v7i12e11329_app1.pdf [file resprot_v7i12e11329_app1.pdf]

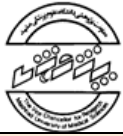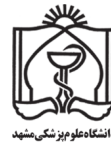

|                                                                                                                                           |                             |
|-------------------------------------------------------------------------------------------------------------------------------------------|-----------------------------|
| <b>عنوان پروژه: «اجرا و سنجش پایلوت مداخله بومی سازی شده با هدف افزایش فعالیت فیزیکی و تغذیه سالم در میان کودکان بیش دبستانی در ایران</b> |                             |
| شماره: 941586                                                                                                                             | مجربان طرح: دکتر محسن نعمتی |
| مدت زمان اجرای طرح (ماه): 26 ماه                                                                                                          | جمع هزینه طرح: 304300000    |
| مقطع (اگر طرح پیشنهادی پایان نامه است): .....                                                                                             |                             |
| اسناد و ضمایم همراه طرح                                                                                                                   |                             |
| -                                                                                                                                         |                             |
| -                                                                                                                                         |                             |
| -                                                                                                                                         |                             |

- ✚ در صورتی داوری این طرح را بپذیرید که در حوزه این پژوهش تخصص کافی را داشته و اشتراک یا تضاد منافی با پژوهشگران این طرح نداشته باشید.
- ✚ لطفاً با استقلال کامل، شفافیت (transparency)، اخلاق و رفتار جوانمردانه (fairness) طرح را داوری نمایید.
- ✚ داوری شما مبنا اصلی تصمیم‌گیری نهایی برای پذیرش و رد این پژوهش است لذا با دقت فراوان و توجه به نقاط قوت و ضعف، داوری خود را انجام داده و هر نکته‌ای که به بهبود پژوهش کمک می‌کند را ذکر نمایید.
- ✚ توصیه‌های خود را به شکلی بنویسید که برای طراحان مفهوم، مفید، اختصاصی و حاوی اطلاعات کافی برای اصلاح پژوهش باشد. از ذکر جملات کلی نظیر "نامناسب است" اجتناب نمایید.
- ✚ در داوری خود فقط و فقط مسائل علمی را لحاظ نموده و در هر بخش حتماً نکات مثبت و منفی را ذکر نمایید.
- ✚ نظر کلی خود در مورد هر بخش را بطور مستقل از بخش‌های دیگر منظور نمایید و اشکال یک بخش نباید در ارزیابی شما در بخش‌های دیگر مجدداً لحاظ شود.

| <b>هدف و ضرورت انجام کار</b>                          |                                                                                     |      |     |          |
|-------------------------------------------------------|-------------------------------------------------------------------------------------|------|-----|----------|
| در نگارش نکات مثبت و منفی موارد زیر را در نظر بگیرید. |                                                                                     |      |     |          |
| ✓                                                     | هدف چقدر دقیق و شفاف بیان شده است.                                                  |      |     |          |
| ✓                                                     | مشکل و ضرورت انجام پژوهش چقدر شفاف و قابل راستی‌آزمایی است و آیا در راستای هدف است. |      |     |          |
| ✓                                                     | تئوری و شواهد ذکر شده برای حمایت از ضرورت انجام کار و مشکل مطرح شده کافی است.       |      |     |          |
| ✓                                                     | هدف و یافته‌های احتمالی این پژوهش چقدر برای شما جالب است.                           |      |     |          |
| ✓                                                     | در صورت وجود مداخله مزایا و معایب آن در مقایسه با روش معمول ذکر شده است.            |      |     |          |
| نکات مثبت:                                            |                                                                                     |      |     |          |
| <b>مناسب است</b>                                      |                                                                                     |      |     |          |
| نکات منفی:                                            |                                                                                     |      |     |          |
| به لحاظ هدف و ضرورت طرح:                              |                                                                                     |      |     |          |
| ناکافی                                                | متوسط                                                                               | کافی | خوب | خیلی خوب |

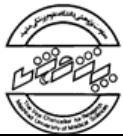

### استراتژی و روش اجرا و قابل اجرا بودن در شرایط کشور

در نگارش نکات مثبت و منفی موارد زیر را در نظر بگیرید.

- ✓ شفافیت
- ✓ طراحی، روش اجرا و روش آنالیز به اندازه کافی تشریح شده است و براساس آن می توان مطالعه را تکرار کرد.
- ✓ چشم انداز رسیدن به اهداف با استفاده از روش اجرا پیشنهادی
- ✓ واقع گرایانه بودن حجم نمونه و امکانات در اختیار
- ✓ واقع گرایانه بودن توانایی ها، موانع و محدودیت های بالقوه ذکر شده

نکات مثبت:

روش کار به خوبی بیان شده است و مناسب است

نکات منفی:

به لحاظ روش اجرا طرح:

|          |     |      |       |        |
|----------|-----|------|-------|--------|
| خیلی خوب | خوب | کافی | متوسط | ناکافی |
|----------|-----|------|-------|--------|

### پژوهشگران

در نگارش نکات مثبت و منفی موارد زیر را در نظر بگیرید.

- ✓ تخصص مناسب و چندوجهی بودن تیم پژوهشی
- ✓ سوابق و کارهای پژوهشی گذشته
- ✓ توان این تیم در به پایان رساندن موفق این پژوهش
- ✓ نیاز به متدولوژیست

نکات مثبت:

با توجه به مشارکت سایر مراکز بسیار مناسب است

نکات منفی:

ترکیب تیم پژوهشی

|          |     |      |       |        |
|----------|-----|------|-------|--------|
| خیلی خوب | خوب | کافی | متوسط | ناکافی |
|----------|-----|------|-------|--------|

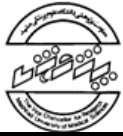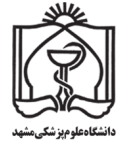

**ارزیابی نوآوری، ارتباط با نیاز و اولویت جامعه و نحوه و زمان لازم برای بکارگیری دستاورد پژوهش در کشور**

در نگارش نکات مثبت و منفی موارد زیر را در نظر بگیرید.

- ✓ این پژوهش چیزی را به دانسته‌های ما اضافه می‌کند.
- ✓ شکاف مهمی را در دانش پر یا در حوزه‌ای است که اختلاف نظر و نتایج متناقض وجود دارد.
- ✓ این پژوهش محصولی جدید شامل دارو، وسیله، روش درمانی/جراحی، دستورالعمل یا ... تولید می‌کند.
- ✓ تکرار پژوهش‌های قبلی یا در حال اجرا که شما مطلع هستید اما از روشی بهتر، دستگاهی دقیقتر برای اندازه‌گیری، حجم نمونه بالاتر برخوردار است یا انجام آن در جمعیت مورد نظر پژوهشگر (مثلا جمعیت ایرانی) لازم یا انتظار هست در این جمعیت نتایج متفاوت باشد.
- ✓ این پژوهش براساس نیاز و مشکل جامعه است.
- ✓ نفع پژوهش برای بیمار یا سلامت جامعه در کوتاه مدت و بلندمدت (کیفیت خدمات بهداشتی-درمانی، هزینه اثربخشی، کاهش افراد بیمار که کار یا مدرسه را ترک می‌کنند و ...) لحاظ شده است.
- ✓ امکان بکارگیری وسیع نتایج این پژوهش وجود دارد
- ✓ روش بکارگیری وسیع نتایج توضیح داده شده و قابل قبول است.

نکات مثبت:

**پژوهش بر اساس نیاز واقعی جامعه است و درجه نوآوری بالایی نیز دارد**

نکات منفی:

**دستاوردهای پژوهش در طرح تکمیل نشده است**

|                                               |          |     |      |       |        |
|-----------------------------------------------|----------|-----|------|-------|--------|
| نوآوری، ارتباط طرح با نیاز و اولویت جامعه ... | خیلی خوب | خوب | کافی | متوسط | ناکافی |
|-----------------------------------------------|----------|-----|------|-------|--------|

**بودجه**

- ✓ هزینه مواد و وسایل و هزینه پرسنلی
- ✓ هزینه اثربخشی: بالانس بین توان، هزینه و منابعی که باید صرف شود و مزایا و نتایج احتمالی چگونه است.

نکات اصلاحی:

**جمع کل هزینه‌ها در طرح ذکر نشده است**

|                          |           |              |         |
|--------------------------|-----------|--------------|---------|
| در مجموع بودجه درخواستی: | خیلی زیاد | واقع‌گرایانه | خیلی کم |
|--------------------------|-----------|--------------|---------|

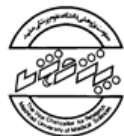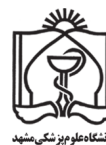

## اخلاق

### در نگارش نکات اصلاحی و ارزیابی خود موارد زیر را در نظر بگیرید.

- ✓ با مطالعه دقیق چک لیست اخلاق (مطالعات انسانی و حیوانی) و در صورت وجود مداخله مزایا و معایب احتمالی آن را برای آزمودنی لحاظ نمایید.
- ✓ فرم رضایتنامه آگاهانه (در صورت نیاز) باید به زبان آزمودنی نوشته شود و اطلاعات کافی برای گرفتن تصمیم آگاهانه در آن وجود داشته باشد.
- ✓ هدف اصلی هر پژوهش باید ارتقای سلامت انسانها توأم با رعایت کرامت و حقوق ایشان باشد.
- ✓ در پژوهش بر آزمودنی انسانی، سلامت و ایمنی آزمودنیها در طول و بعد از اجرای پژوهش، بر تمامی مصالح دیگر اولویت دارد.
- ✓ پژوهش بر انسان فقط در صورتی توجیه پذیر است که منافع بالقوهی آن برای هر فرد آزمودنی بیش تر از خطرهای آن باشد.
- ✓ مواردی از قبیل سرعت، سهولت کار، راحتی پژوهشگر، هزینهی پایین تر و/ یا صرفاً عملی بودن آن به هیچ وجه نباید موجب قرار دادن آزمودنی در معرض خطر یا زبان افزوده یا تحمیل هر گونه محدودیت اختیاری اضافی به وی شود.
- ✓ در کارآزمایی های بالینی دوسوکور که آزمودنی از ماهیت دارویی یا مداخله ای که برای وی تجویز شده بی اطلاع است، پژوهشگر باید تدابیر لازم جهت کمک رسانی به آزمودنی در صورت لزوم و در شرایط اضطراری را تدارک ببیند.
- ✓ در پژوهش های پزشکی که ممکن است به محیط زیست آسیب برسانند، باید احتیاط های لازم در جهت حفظ و نگهداری و عدم آسیب رسانی به محیط زیست انجام گیرد.
- ✓ در پژوهش هایی که از مواد بدنی (شامل بافت ها و مایعات بدن انسان) یا داده هایی استفاده می شود که هویت صاحبان آنها معلوم یا قابل کشف و ردیابی است، باید برای جمع آوری، تحلیل، ذخیره سازی و/یا استفاده ی مجدد از آنها رضایت آگاهانه گرفته شود.
- ✓ در مواردی که آگاه کردن آزمودنی درباره ی جنبه ای از پژوهش باعث کاهش اعتبار پژوهش می شود، ضرورت اطلاع رسانی ناکامل از طرف پژوهشگر باید توسط کمیته ی اخلاق تأیید شود. بعد از رفع عامل این محدودیت، باید اطلاع رسانی کامل به آزمودنی انجام گیرد.
- ✓ برخی از افراد یا گروه هایی از مردم، نظیر ناتوانان ذهنی، کودکان، جنین و نوزاد، بیماران اورژانسی، یا زندانیان، سرباز که ممکن است به عنوان آزمودنی در پژوهش شرکت کنند، نمی توانند برای دادن رضایت، آگاهی یا آزادی لازم را داشته باشند. این افراد یا گروه ها آسیب پذیر دانسته می شوند و باید مورد حفاظت ویژه قرار گیرند.
- ✓ پژوهشگر مسؤول رعایت اصل رازداری و حفظ اسرار آزمودنیها و اتخاذ تدابیر مناسب برای جلوگیری از انتشار آن است. هم چنین، پژوهشگر موظف است که از رعایت حریم خصوصی آزمودنیها در طول پژوهش اطمینان حاصل کند. هرگونه انتشار داده ها یا اطلاعات به دست آمده از بیماران باید بر اساس رضایت آگاهانه انجام گیرد.
- ✓ روش پژوهش نباید با ارزش های اجتماعی، فرهنگی و دینی جامعه در تناقض باشد.
- ✓ مطالعات حیوانی باید با رعایت کامل اصول اخلاقی کار با حیوانات آزمایشگاهی انجام شوند.

### نکات اصلاحی:

|                  |        |                     |               |                 |
|------------------|--------|---------------------|---------------|-----------------|
| غیر قابل ارزیابی | اخلاقی | با دقت و نظارت زیاد | غیر قابل اجرا | به لحاظ اخلاقی: |
|------------------|--------|---------------------|---------------|-----------------|
